# Supplementary material for: BmK AEP, an Anti-Epileptic Peptide Distinctly Affects the Gating of Brain Subtypes of Voltage-Gated Sodium Channels
Source: PubMed Central journal article supplement (PMC6387193; doi:10.3390/ijms20030729), 2019-02-08
Supplement: ijms-20-00729-s001.pdf [file ijms-20-00729-s001.pdf]

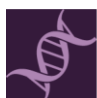

## BmK AEP, an Anti-Epileptic Peptide Distinctly Affects the Gating of Brain Subtypes of Voltage-Gated Sodium Channels

Fan Zhang <sup>†</sup>, Ying Wu <sup>†</sup>, Xiaohan Zou, Qinglian Tang, Fang Zhao and Zhengyu Cao <sup>\*</sup>

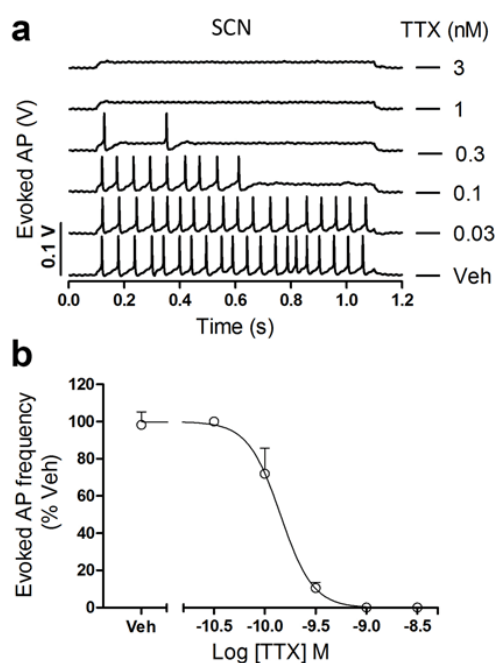

**Figure 1.** TTX blocks evoked action potentials in primary cultured spinal cord neurons. (A) Representative traces of APs evoked by an injection of 30-pA current in spinal cord neurons in the absence and presence of different concentrations of TTX as indicated. (B) Concentration-response relationship of TTX inhibition of evoked APs in spinal cord neurons. Each data point represents the mean  $\pm$  SEM ( $n = 5$ ).

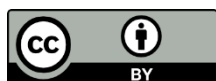

© 2019 by the authors. Submitted for possible open access publication under the terms and conditions of the Creative Commons Attribution (CC BY) license (<http://creativecommons.org/licenses/by/4.0/>).
